# Supplementary figures and images for: Causal Relationship between Subacute Thyroiditis and Papillary Thyroid Cancer: a two-sample Mendelian Randomization Analysis
Source: Research Square preprint supplement (doi:10.21203/rs.3.rs-6695976/v1), 2025-06-09

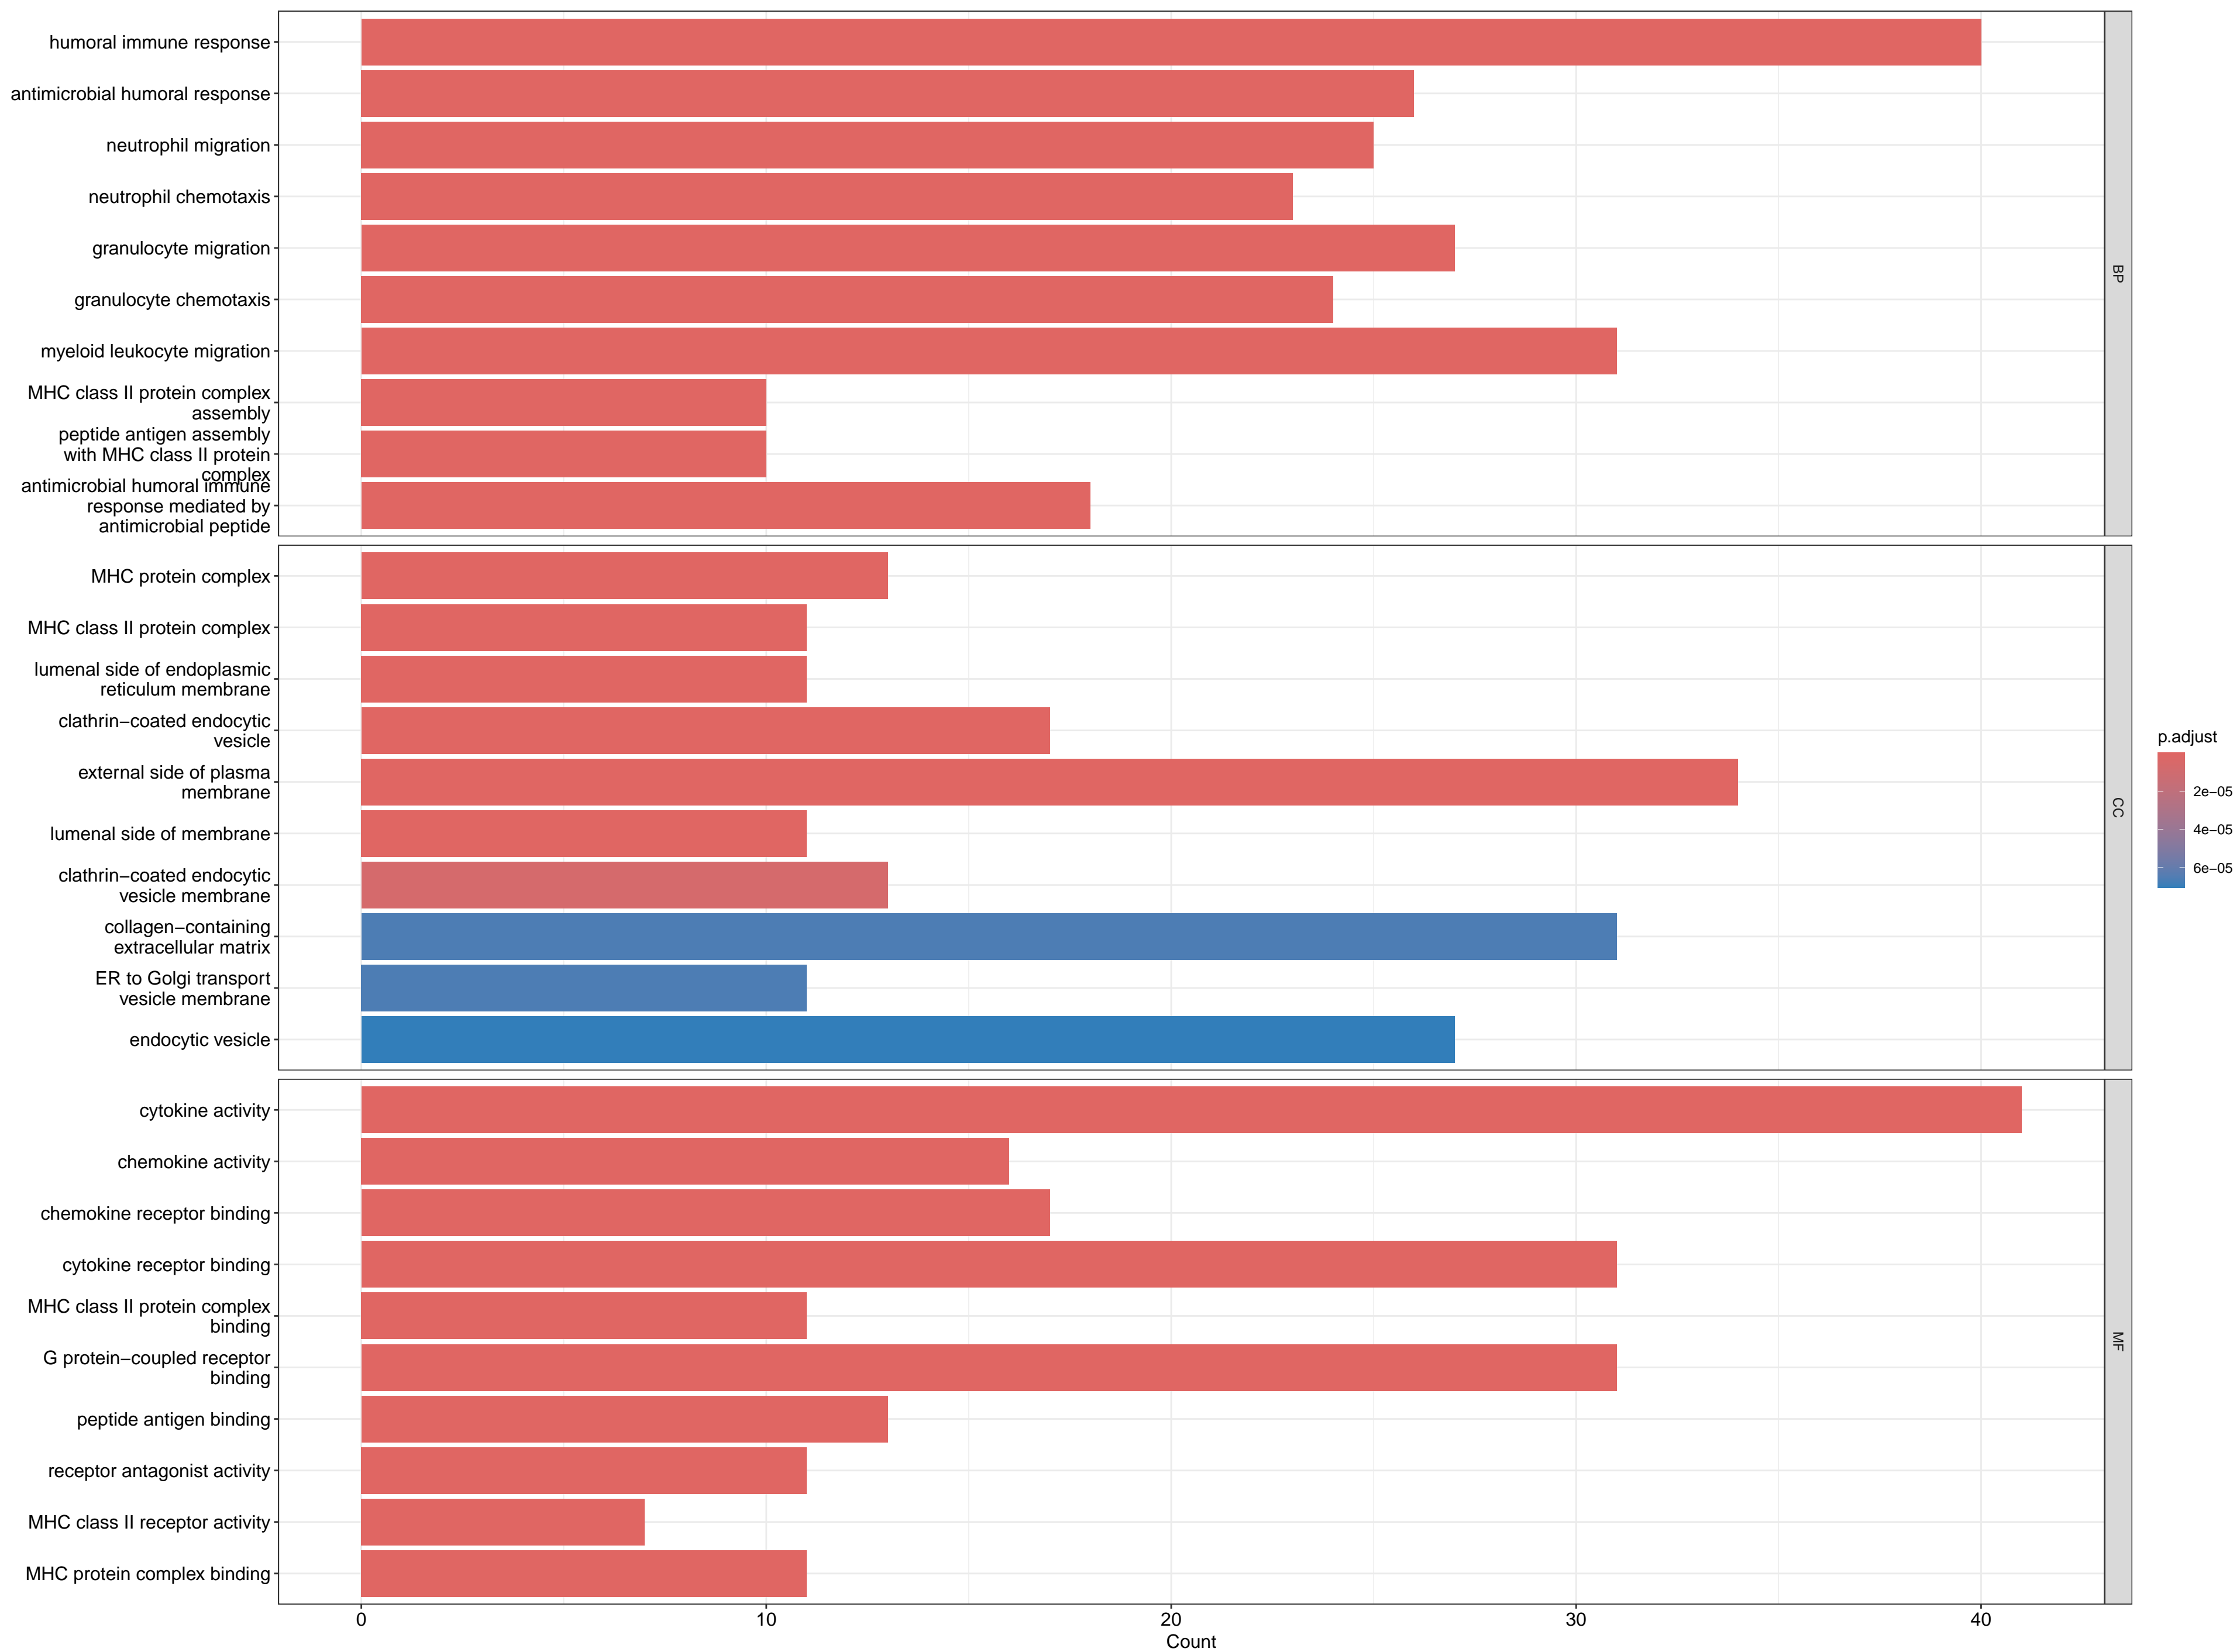

Supplement: Supplementary file 1 [file 36ea43768cfbe06c3c4db6c1.pdf]

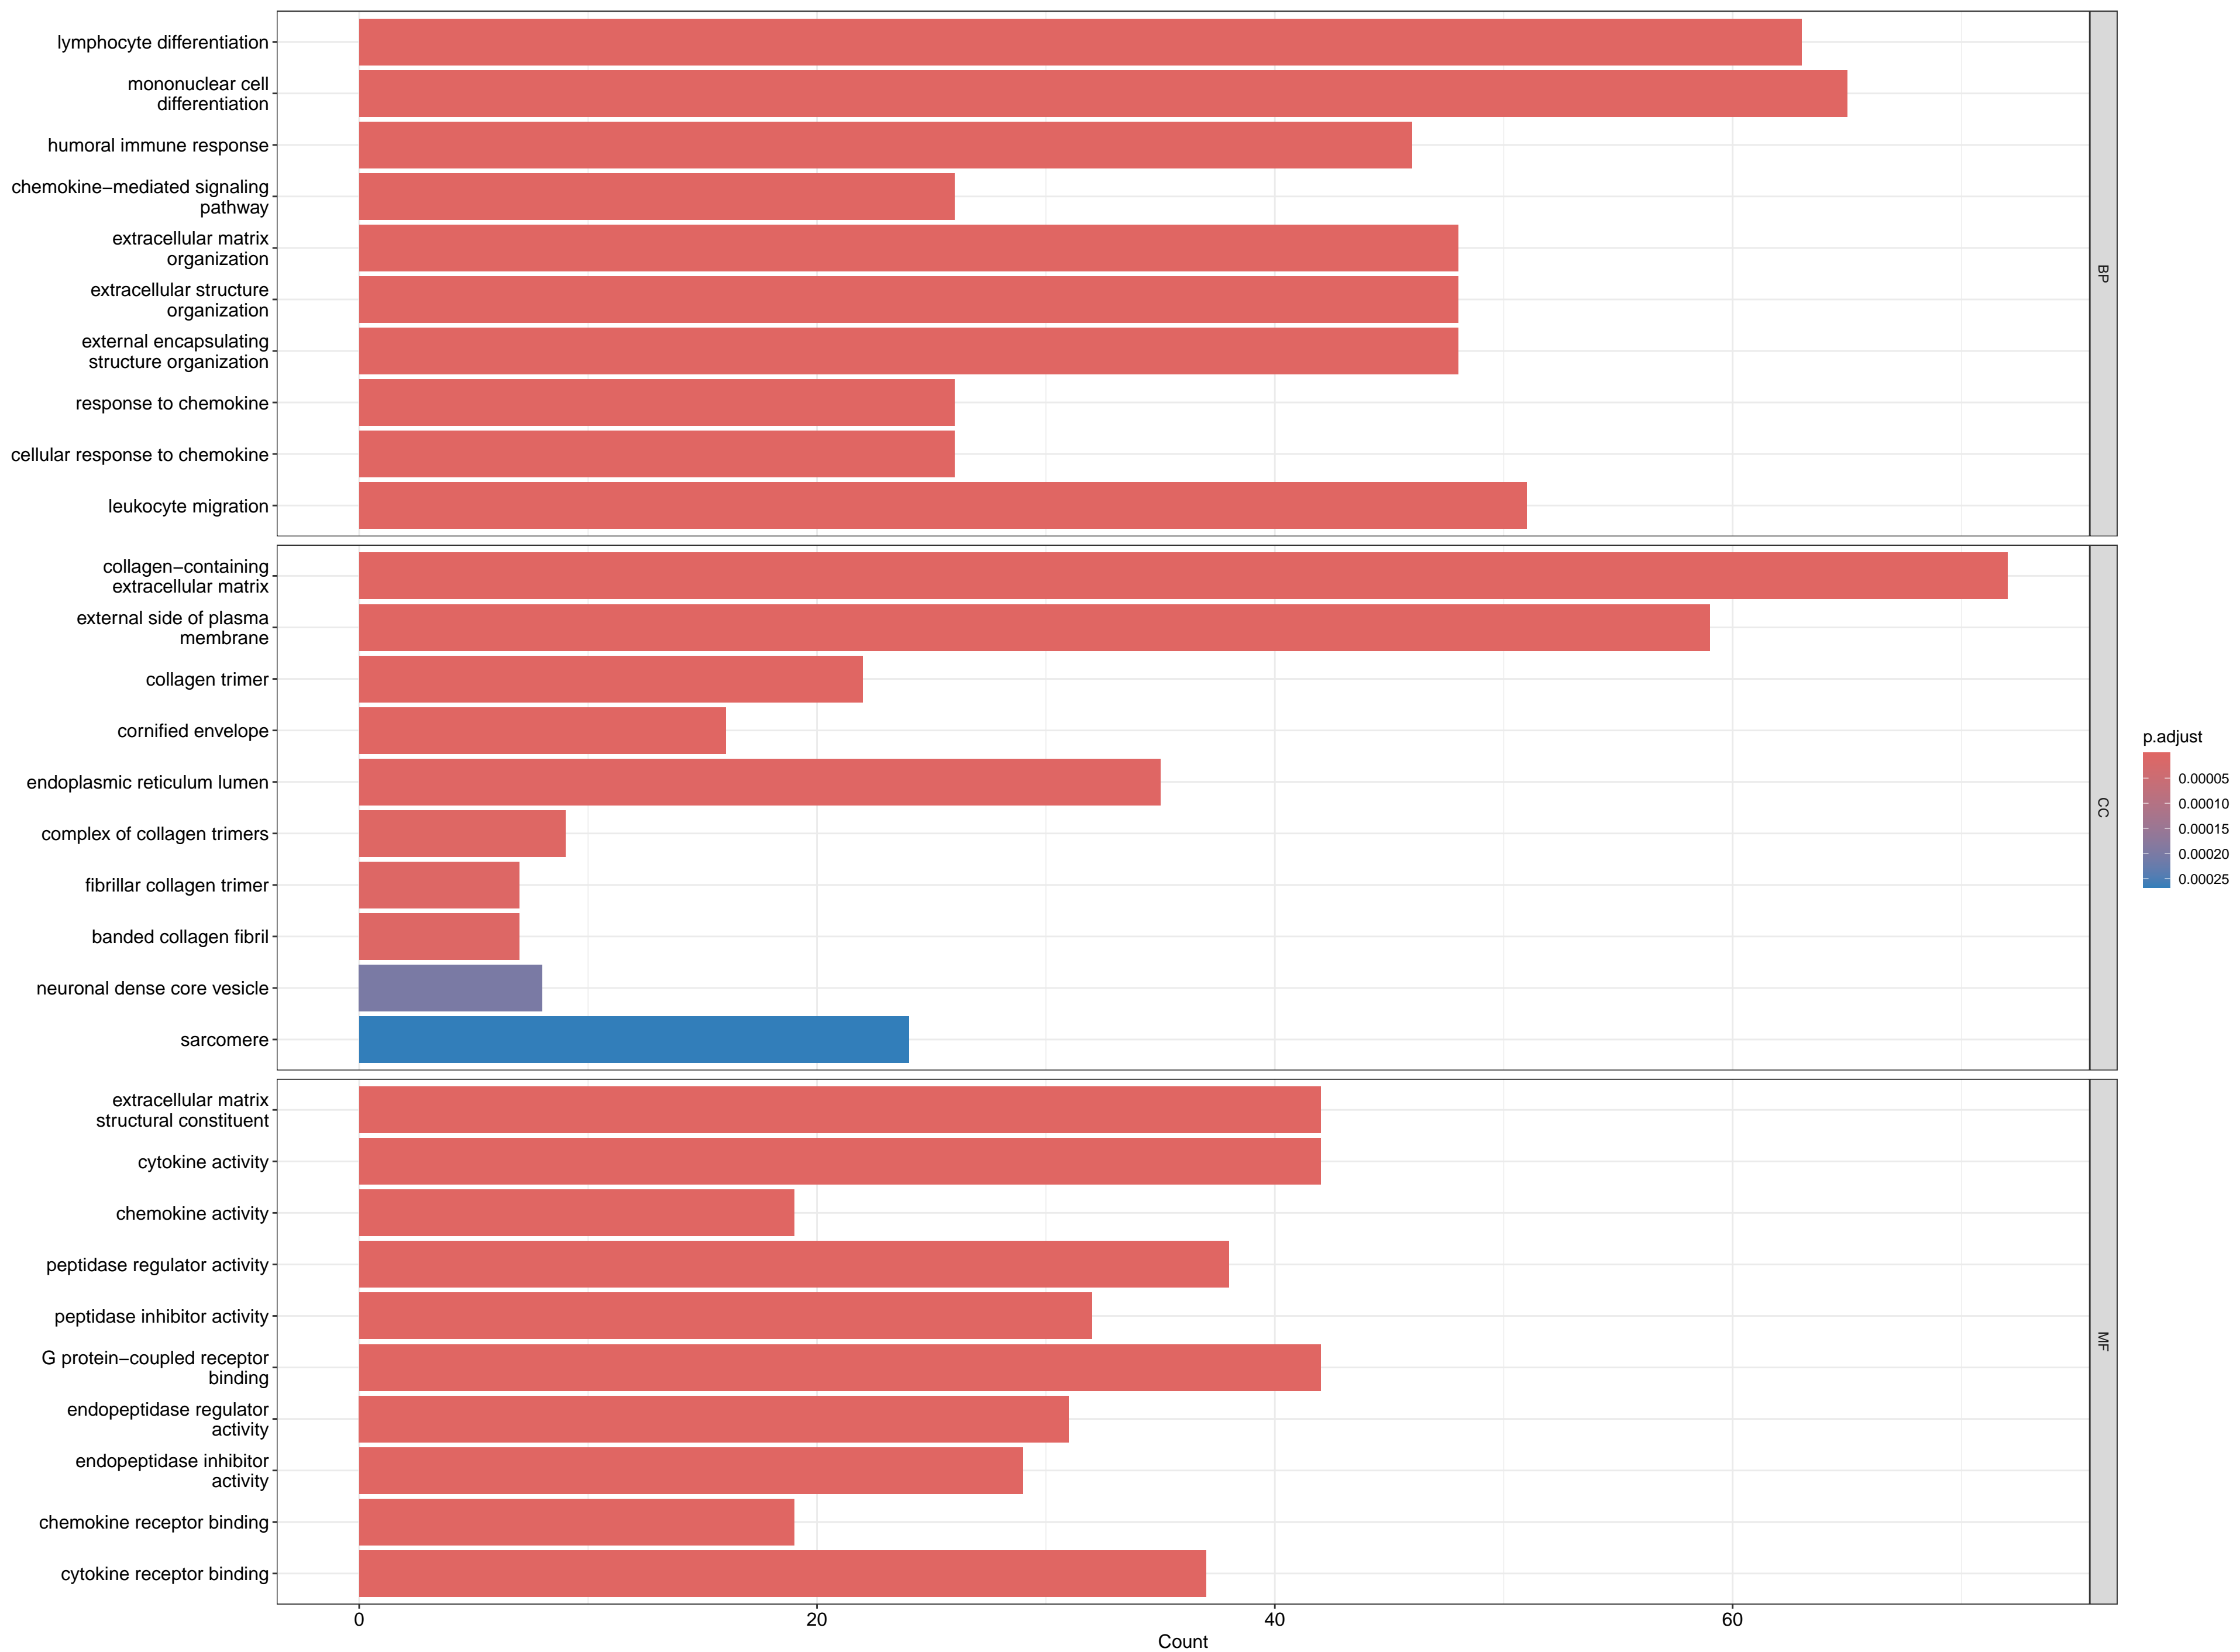

Supplement: Supplementary file 2 [file 7a7e7af20cd37a62906293b7.pdf]
